# Supplementary material for: Solvent-assisted amine modification of graphite oxide for CO2adsorption
Source: Royal Society of Chemistry journal article supplement (doi:10.1039/c4ra09314c), 2014-10-31
Supplement: c4ra09314c1.pdf [file c4ra09314c1.pdf]

ARTICLE

Electronic Supplementary Information (ESI) for RSC Adv.

## Solvent-Assisted Amine Modification of Graphite Oxide for CO<sub>2</sub> Adsorption

Seok-Min Hong and Ki Bong Lee\*

Department of Chemical and Biological Engineering, Korea University, 145 Anam-ro, Seongbuk-gu, Seoul 136-713, Republic of Korea  
Tel.: +82 2 3290 4851; FAX: +82 2 926 6102; E-mail: kibonglee@korea.ac.kr

**Table S1.** Textural properties of GO, GA-E, and GA-W.

| Sample | Textural Properties                                                 |                                                                    |                                                                    |
|--------|---------------------------------------------------------------------|--------------------------------------------------------------------|--------------------------------------------------------------------|
|        | S <sub>BET</sub> <sup>a)</sup><br>(m <sup>2</sup> g <sup>-1</sup> ) | V <sub>T</sub> <sup>b)</sup><br>(cm <sup>3</sup> g <sup>-1</sup> ) | D <sub>p</sub> <sup>c)</sup><br>(cm <sup>3</sup> g <sup>-1</sup> ) |
| GO     | 10.1                                                                | 0.018                                                              | 9.9                                                                |
| GA-E   | 10.2                                                                | 0.026                                                              | 15.7                                                               |
| GA-W   | 9.6                                                                 | 0.031                                                              | 19.4                                                               |

<sup>a)</sup> Surface area measured by Brunauer-Emmett-Teller (BET) equation. <sup>b)</sup> Total pore volume at  $p/p_0 \sim 0.98$ . <sup>c)</sup> BJH desorption average pore diameter ( $4 V/A$ ).
